# Supplementary material
Source: MDPI journal article supplement (https://www.mdpi.com/2072-4292/11/5/576)
Supplement: s1 [file s1]

# Supplementary Materials: Trends in Woody and Herbaceous Vegetation in the Savannas of West Africa

Julius Y. Anchang, Lara Prihodko, Armel T. Kaptué, Christopher W. Ross, Wenjie Ji, Sanath S. Kumar, Brianna Lind, Mamadou A. Sarr, Abdoul A. Diouf and Niall P. Hanan

Google Earth Engine code used to retrieve and prepare NDVI and rainfall data for trend analysis:

*i*NDVI: <https://code.earthengine.google.com/5ad235ae90ef916d7b2e0cdf446dc348>

*i*Rain: <https://code.earthengine.google.com/42398cc10e53835e7a03b8364f82bea0>

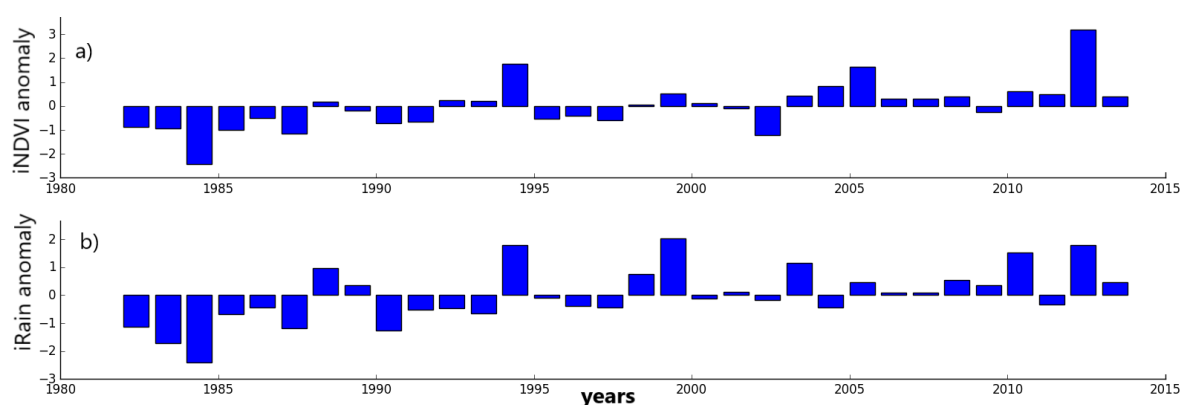

**Figure 1.** Yearly anomalies (in units of standard deviation) of a) *i*NDVI and b) *i*Rain, averaged for the study area.

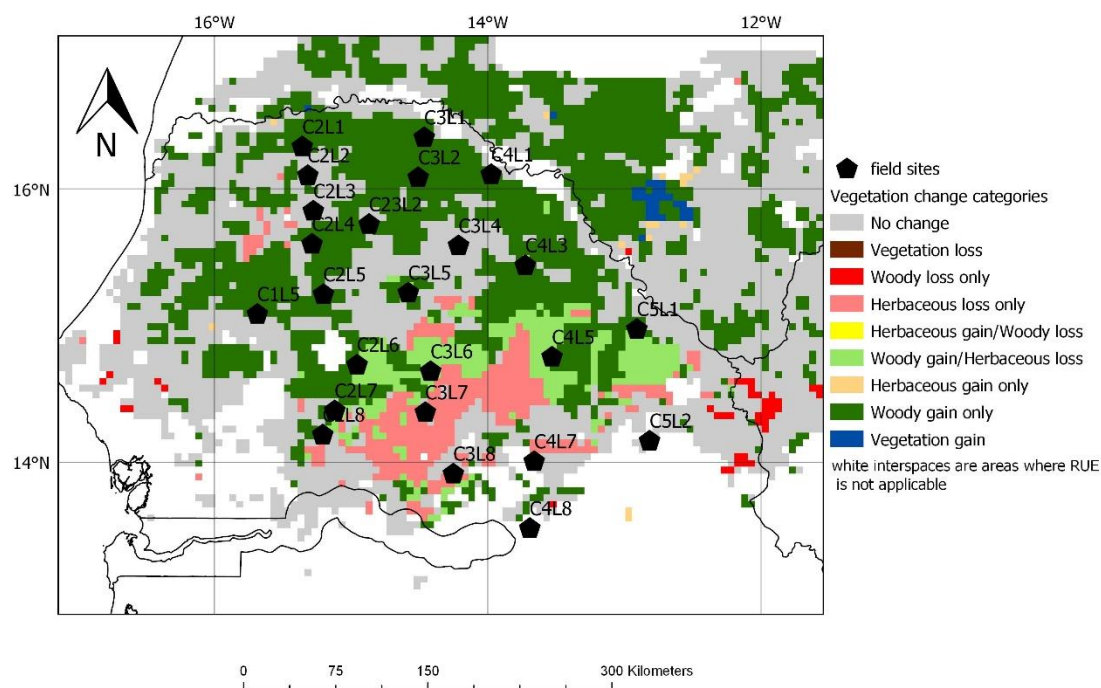

**Figure 2.** Map of Senegal showing locations of 24 sites with long-term in situ biomass data used to validate/support pixel-based trends.

**Table 1.** Summary of in situ data used to support pixel-based vegetation trend.

| Pixel trend inferred from RUE change       | Site name | Number of years of available data | Woody leaf biomass trend (kg ha <sup>-1</sup> year <sup>-1</sup> ) | herbaceous biomass trend (kg ha <sup>-1</sup> year <sup>-1</sup> ) |
|--------------------------------------------|-----------|-----------------------------------|--------------------------------------------------------------------|--------------------------------------------------------------------|
| RUE concept not applicable (2 sites)       | C4L7      | 26                                | NA                                                                 | NA                                                                 |
|                                            | C4L8      | 23                                | NA                                                                 | NA                                                                 |
| no change (8 sites)                        | C23L2     | 21                                | (✓) 24.93                                                          | (✓) 21.04                                                          |
|                                            | C2L2      | 27                                | (X) 19.22*                                                         | (✓) 16.29                                                          |
|                                            | C2L3      | 25                                | (X) 28.13*                                                         | (✓) -2.39                                                          |
|                                            | C2L4      | 25                                | (X) 7.87*                                                          | (✓) -3.10                                                          |
|                                            | C2L7      | 24                                | (✓) 9.48                                                           | (✓) -8.48                                                          |
|                                            | C3L4      | 25                                | (X) 47.49*                                                         | (✓) 7.54                                                           |
|                                            | C3L8      | 27                                | (X) 96.57*                                                         | (✓) -13.70                                                         |
|                                            | C5L2      | 16                                | (X) 84.53*                                                         | (✓) -19.35                                                         |
| herbaceous loss no woody change (1 site)   | C3L7      | 17                                | (X) 48.61*                                                         | (X) -30.11                                                         |
| woody gain                                 | C3L5      | 30                                | (✓) 50.32*                                                         | (✓) -15.85*                                                        |
| herbaceous loss (3 sites)                  | C3L6      | 20                                | (✓) 38.85*                                                         | (X) -28.68                                                         |
|                                            | C4L5      | 24                                | (✓) 28.77*                                                         | (X) 13.91                                                          |
| woody gain no herbaceous change (10 sites) | C1L5      | 24                                | (X) -90                                                            | (✓) 17.93                                                          |
|                                            | C2L1      | 26                                | (✓) 14.40*                                                         | (✓) 7.17                                                           |
|                                            | C2L5      | 26                                | (✓) 28.78*                                                         | (✓) -14.55                                                         |
|                                            | C2L6      | 28                                | (✓) 50.88*                                                         | (X) -43.94*                                                        |
|                                            | C2L8      | 26                                | (✓) 67.45*                                                         | (✓) -13.30                                                         |
|                                            | C3L1      | 25                                | (X) 7.74                                                           | (✓) 1.60                                                           |
|                                            | C3L2      | 29                                | (X) 14.82                                                          | (✓) 12.62                                                          |
|                                            | C4L1      | 25                                | (X) 14.98                                                          | (✓) 7.06                                                           |
|                                            | C4L3      | 20                                | (✓) 38.03*                                                         | (✓) -12.82                                                         |
|                                            | C5L1      | 26                                | (✓) 34.74*                                                         | (X) 29.54*                                                         |
|                                            |           |                                   | ✓ = 50%                                                            | ✓ = 77%                                                            |
|                                            |           |                                   | X = 50%                                                            | X = 23%                                                            |

\*significant trend (p-value of slope of biomass vs time <0.05), RUE = rain use efficiency

⊗ = in situ data agrees with pixel trend

X = in situ data does not agree with pixel trend

Agreement determined using sign, +/-, and statistical significance of trend at each site

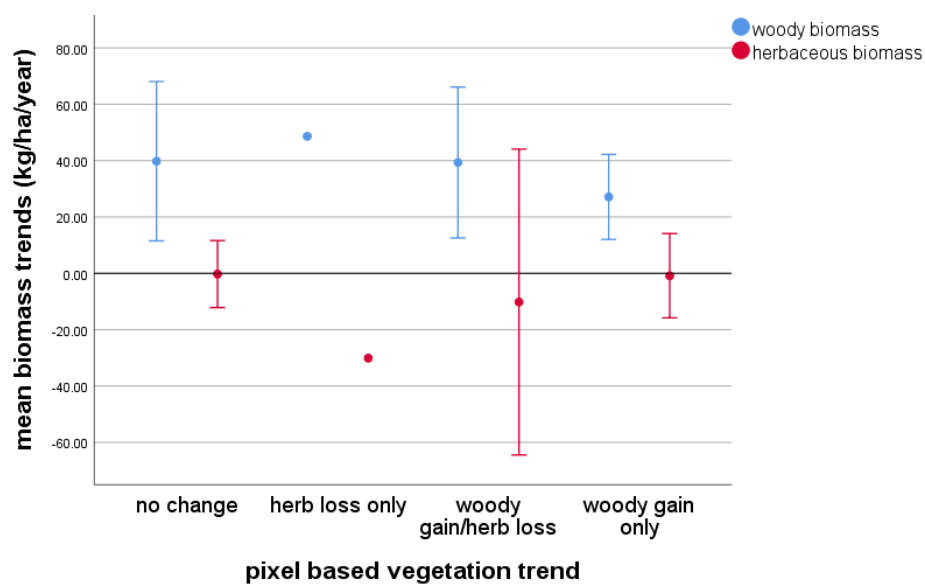

**Figure 3.** Comparison of mean in situ biomass trends ( $\text{kg ha}^{-1} \text{ year}^{-1}$ ) across vegetation change categories inferred from RUE change analysis (See Figures 9 and S2 for categories). Error whiskers indicate a 95% confidence interval.
